# Supplementary material
Source: publisher figshare collection journal article supplement (https://frontiersin.figshare.com/ndownloader/files/31435801)
Supplement: Supplementary file 1 [file 31435801]

## *Supplementary Figure Captions*

### **1 Supplementary Figure Captions**

#### **1.1 Caption for Supplementary Figure 1**

**Supplementary Figure 1.** Difference in predicted Scots pine tree height in the Nordic region between future ensemble mean predictions made for RCPs 2.6 (A), 4.5 (B), 6.0 (C) and 8.5 (D) on one hand, and predictions made for the reference period (1961-1990).

#### **1.2 Caption for Supplementary Figure 2**

**Supplementary Figure 2.** Difference in predicted accumulated growing day degrees above 5°C (temperature sum) between future ensemble means for RCPs 2.6 (A), 4.5 (B), 6.0 (C) and 8.5 (D) on one hand, and predictions made for the reference period (1961-1990) in the Nordic region.

#### **1.3 Caption for Supplementary Figure 3**

**Supplementary Figure 3.** Difference in predicted Scots pine tree height, within the species distribution range in Spain, between future ensemble mean predictions made for RCPs 2.6 (A), 4.5 (B), 6.0 (C) and 8.5 (D) on one hand, and predictions made for the reference period (1961-1990).

#### **1.4 Caption for Supplementary Figure 4**

**Supplementary Figure 4.** Difference in predicted annual temperature differential (warmest-coldest month, continentality) between future ensemble means for RCPs 2.6 (A), 4.5 (B), 6.0 (C) and 8.5 (D) on one hand, and predictions made for the reference period (1961-1990) within the species distribution areas of Spain.

#### **1.5 Caption for Supplementary Figure 5**

**Supplementary Figure 5.** Difference in predicted summer heat moisture index (SHM) between future ensemble means for RCPs 2.6 (A), 4.5 (B), 6.0 (C) and 8.5 (D) on one hand, and predictions made for the reference period (1961-1990) within the species distribution areas of Spain.
