# Supplementary material
Source: publisher figshare collection journal article supplement (https://frontiersin.figshare.com/ndownloader/files/31435801)
Supplement: Supplementary file 3 [file 31435801]

Archive with 8 entries (8 files):
- Data Sheet 1/Supplementary figure 1.JPEG
- Data Sheet 1/Supplementary figure 2.JPEG
- Data Sheet 1/Supplementary figure 3.JPEG
- Data Sheet 1/Supplementary figure 4.JPEG
- Data Sheet 1/Supplementary figure 5.JPEG
- Data Sheet 1/Supplementary figure captions.pdf
- Data Sheet 1/Supplementary material and methods 1.pdf
- Data Sheet 1/Supplementary material and methods 2.pdf
