# Supplementary material
Source: publisher figshare collection journal article supplement (https://frontiersin.figshare.com/ndownloader/files/31435801)
Supplement: Supplementary file 3 [file 31435801 › Data Sheet 1/Supplementary material and methods 2.pdf]

## Supplementary Material and Methods 2

### 1 Supplementary Material 2. Development of the height models

#### 1.1 Nordic model

A linear mixed-effects model was used to predict tree height as a function of the transfer distance in latitude ( $\Delta env = \Delta LAT$ ) being a proxy primarily for photoperiod. In addition, the GDD5 was used to describe the climate of the field trial and was used in interaction terms with the latitudinal transfer distance. These variables were included as fixed effects and the field trial site as a random effect, to account for unexplained environmental variation. This model was established by a hypothesis-driven process, building on the work of previous regional modeling (Persson and Ståhl, 1993; Persson, 1994; Berlin et al., 2016; Eriksson, 2008). Logarithm-transformed LS-means of tree height estimated for each provenance-field trial combination ( $\ln(H_{jk})$ ) were fitted as follows:

$$\ln(H_{jk}) = \alpha_0 + \alpha_1 \ln(AGE_k) + \alpha_2 \ln(EST_k - 1945) + \alpha_3 \ln(GDD5_{sk}) + \alpha_4 \Delta LAT_{jk} + \alpha_5 \Delta LAT_{jk}^2 + \alpha_6 GDD5_{sk} \times \Delta LAT_{jk} + \alpha_7 GDD5_{sk} \times \Delta LAT_{jk}^2 + \beta(Trial) + \varepsilon_{jk}$$

where  $AGE_k$  is the tree age for the  $k$ th field trial at measurement,  $EST_k$  is the establishment year of the  $k$ th field trial where the term  $\alpha_2$  accounts for rapid silvicultural improvements made after the 2nd World War.  $AGE$  and  $EST$  are both technical variables included to properly adjust the data collected from the substantial but very heterogeneous set of Nordic field trials. However, these variables are not critical *per se* for the assessment of climate change and associated prediction uncertainty. In contrast, the accumulated growing day degrees  $GDD5_{sk}$  is an environmental variable associated with the  $k$ th field trial averaged from the year of planting to the year of height measurement. In addition,  $\Delta LAT_{jk}$  is the latitudinal transfer distance between the  $k$ th field trial and the  $j$ th provenance present at the  $k$ th field trial. Finally,  $\beta$  is the random field trial effect and  $\varepsilon_{ijk}$  is the residual distribution of the  $j$ th provenance at the  $k$ th field trial following a Gaussian distribution.

The Nordic tree height model used in this study consists of the same variables as the model developed in Berlin et al. (2016). However, in that study an older, regional climate data set (PTHBV/FINADAPT) for the time period 1961-2007 was used and here all coefficients were re-estimated using the more advanced and modern CRU-TS data set and trial-wise time periods between establishment and assessment. Given that the current re-analysis of the model both included a new climate data set with another spatial resolution and different time spans we performed a number of comparisons to ensure that the model structure would still be valid. We concluded that it was, as all model coefficients were still highly significant, with the same sign and magnitude and that the resulting transfer effect patterns were very similar. Consequently, as there were no new model development procedures performed for the Nordic tree height model in this study, we refer to the detailed description given in Berlin et al. (2016).

#### 1.2 Spanish model

We used linear mixed-effects models to predict tree height as a function of the environmental transfer distance of the Summer Heat Moisture index ( $\Delta env = \Delta SHM$ ), the spring precipitation climate at the field trial site ( $SPR_s$ ) and the Temperature Differential at the field trial site ( $TD_s$ ) following previous

models of the species in Spain (Vizcaíno-Palomar et al., 2019). In the model, climatic variables were included as fixed effects and specifically we modelled the linear, quadratic and linear interaction terms of  $\Delta SHM$  and  $SPR\_s$ , and the linear term for the covariate  $TD\_s$ . In the random part of the model, we included provenance for unaccounted environmental variation among populations. We did not include blocks nested within field trials and field trials as random effects because they captured most of the available phenotype variability among field trials. We rather preferred to explain this variation by known fixed effects than to relate them to unspecified environmental drivers.

The final model was built based upon a hierarchical backward selection procedure from the most complex model, that is, the model that contains all possible variable combinations as the model described above (Supplementary Table S1). We used the AIC criteria to select the terms of the final model by following the rule that net increments of lower than two units of AIC associated with the elimination of any parameter in the full model determined the exclusion of the parameter from the final model (Akaike et al., 1992, Bolker et al., 2009). We started with the selection of the two-variable interaction (round 1) and then tested the quadratic effects of both climate variables,  $\Delta SHM$  and  $SPR\_s$  (rounds 2 & 3), and so on downwards the main effects of each predictor,  $\Delta SHM$ ,  $SPR\_s$  and  $TD\_s$  (round 4). Fixed effects were tested using the maximum likelihood (ML), and random effects were tested using the restricted maximum-likelihood method (REML). The final Spanish model for individual tree height,  $H_{ijk}$ , was fitted as follows:

$$H_{ijk} = \alpha_0 + \alpha_1 TD\_s_{ik} + \alpha_2 SPR\_s_{ik} + \alpha_3 SPR\_s_{ik}^2 + \alpha_4 \Delta SHM_{ijk} + \alpha_5 \Delta SHM_{ijk}^2 + \alpha_6 SPR\_s_{ik} \times \Delta SHM_{ijk} + \beta(Provenance) + \varepsilon_{ijk}$$

where  $H_{ijk}$  is tree height growth of the  $i$ th individual of the  $j$ th provenance in the  $k$ th field trial.  $\alpha_s$  is the set of  $n$  parameters associated with the fixed effects of the model,  $\Delta SHM_{ijk}$  is the environmental transfer distance computed for the SHM index, as the difference between the SHM values at the provenance origin of the  $i$ th individual of the  $j$ th provenance;  $clim\_s_{ik}$  is the climate (spring precipitation, SPR and temperature differential, TD) at the field trial of the  $i$ th individual in the  $k$ th field trial.  $\beta$  are the random effects.  $\varepsilon_{ijk}$  is the residual distribution of the  $i$ th individual of the  $j$ th population in the  $k$ th field trial following a Gaussian distribution.

Supplementary Table S1. Fixed effects selection for the tree height model following a hierarchical backward procedure using AIC (Akaike et al., 1992). d.f.: degrees of freedom, AIC: Akaike values,  $\Delta$ AIC: difference in AIC values between alternative models.  $MR^2$  is the percentage of the variance explained by the fixed effects of the model.  $CR^2$  is the percentage of the variance explained by the fixed and random effects of the model.  $MR^2$  and  $CR^2$  values are given for the best supported mixed-effect model.

| Fixed effect selection              | df | AIC      | $\Delta$ AIC | $MR^2$ | $CR^2$ |
|-------------------------------------|----|----------|--------------|--------|--------|
| (round # 1)                         |    |          |              |        |        |
| full model                          | 9  | 53961.39 | 0.00         |        |        |
| no PREC.spr_s $\times$ $\Delta$ SHM | 8  | 53989.14 | 27.76        |        |        |
| (round # 2)                         |    |          |              |        |        |
| full model                          | 9  | 53961.39 | 0.00         |        |        |
| no quadratic effect $\Delta$ SHM    | 8  | 54169.17 | 207.78       |        |        |
| (round # 3)                         |    |          |              |        |        |
| full model                          | 9  | 53961.39 | 0.00         |        |        |
| no quadratic effect PREC.spr_s      | 8  | 54212.78 | 251.39       |        |        |
| (round # 4)                         |    |          |              |        |        |
| full model                          | 9  | 53961.39 | 0.00         | 39.46  | 42.97  |
| no $\Delta$ SHM                     | 6  | 54287.94 | 326.55       |        |        |
| no PREC.spr_s                       | 6  | 54806.44 | 845.06       |        |        |
| no TD_s                             | 8  | 54047.65 | 86.27        |        |        |
| intercept model                     | 3  | 56221.14 | 2259.75      |        |        |

### 1.3 Reference list of Supplementary Material 2

- Akaike, H. (1992). "Information theory and an extension of the maximum likelihood principle." in Breakthroughs in Statistics, eds. S. Kotz, N. Johnson. (Springer-Verlag: London, UK)
- Berlin, M., Persson, T., Jansson, G., Haapanen, M., Ruotsalainen, S., Barring, L. et al. (2016). Scots pine transfer effect models for growth and survival in Sweden and Finland. *Silva fenn.* 50(3):1562. doi: 10.14214/sf.1562.
- Bolker, B.M., Brooks, M.E., Clark, C.J., Geange, S.W., Poulsen, J.R., Stevens, M.H.H., et al. (2009). Generalized linear mixed models: A practical guide for ecology and evolution. *Trends Ecol. Evol.* 24, 127–135. doi: j.tree.2008.10.008
- Eriksson, G. (2008). *Pinus sylvestris* : recent genetic research. Department of Plant Biology and Forest Genetics, Genetic Center, Swedish University of Agricultural Sciences, Uppsala.
- Persson, B., and Ståhl, E.G. (1993). Effects of provenance transfers in an experimental series of Scots pine (*Pinus sylvestris* L.) in northern Sweden. Swedish University of Agricultural Sciences, Department of Forest Yield Research. Report 35. ISSN 034-7634 (In Swedish with English summary).
- Persson, B. (1994). Effects of climate and provenance transfer on survival, production and stem quality of Scots pine (*Pinus sylvestris* L.) in northern Sweden. [dissertation thesis]. [Sweden, Garpenberg]: Swedish University of Agricultural Sciences. ISSN 0348-7636
- Vizcaíno-Palomar, N., González-Muñoz, N., González-Martínez, S.C., Alia, R., Benito Garzón, M. (2019). Most southern Scots pine populations are locally adapted to drought for tree height growth. *Forests*, 10:555. doi: 10.3390/f10070555
