# Supplementary material
Source: publisher figshare collection journal article supplement (https://frontiersin.figshare.com/ndownloader/files/31435801)

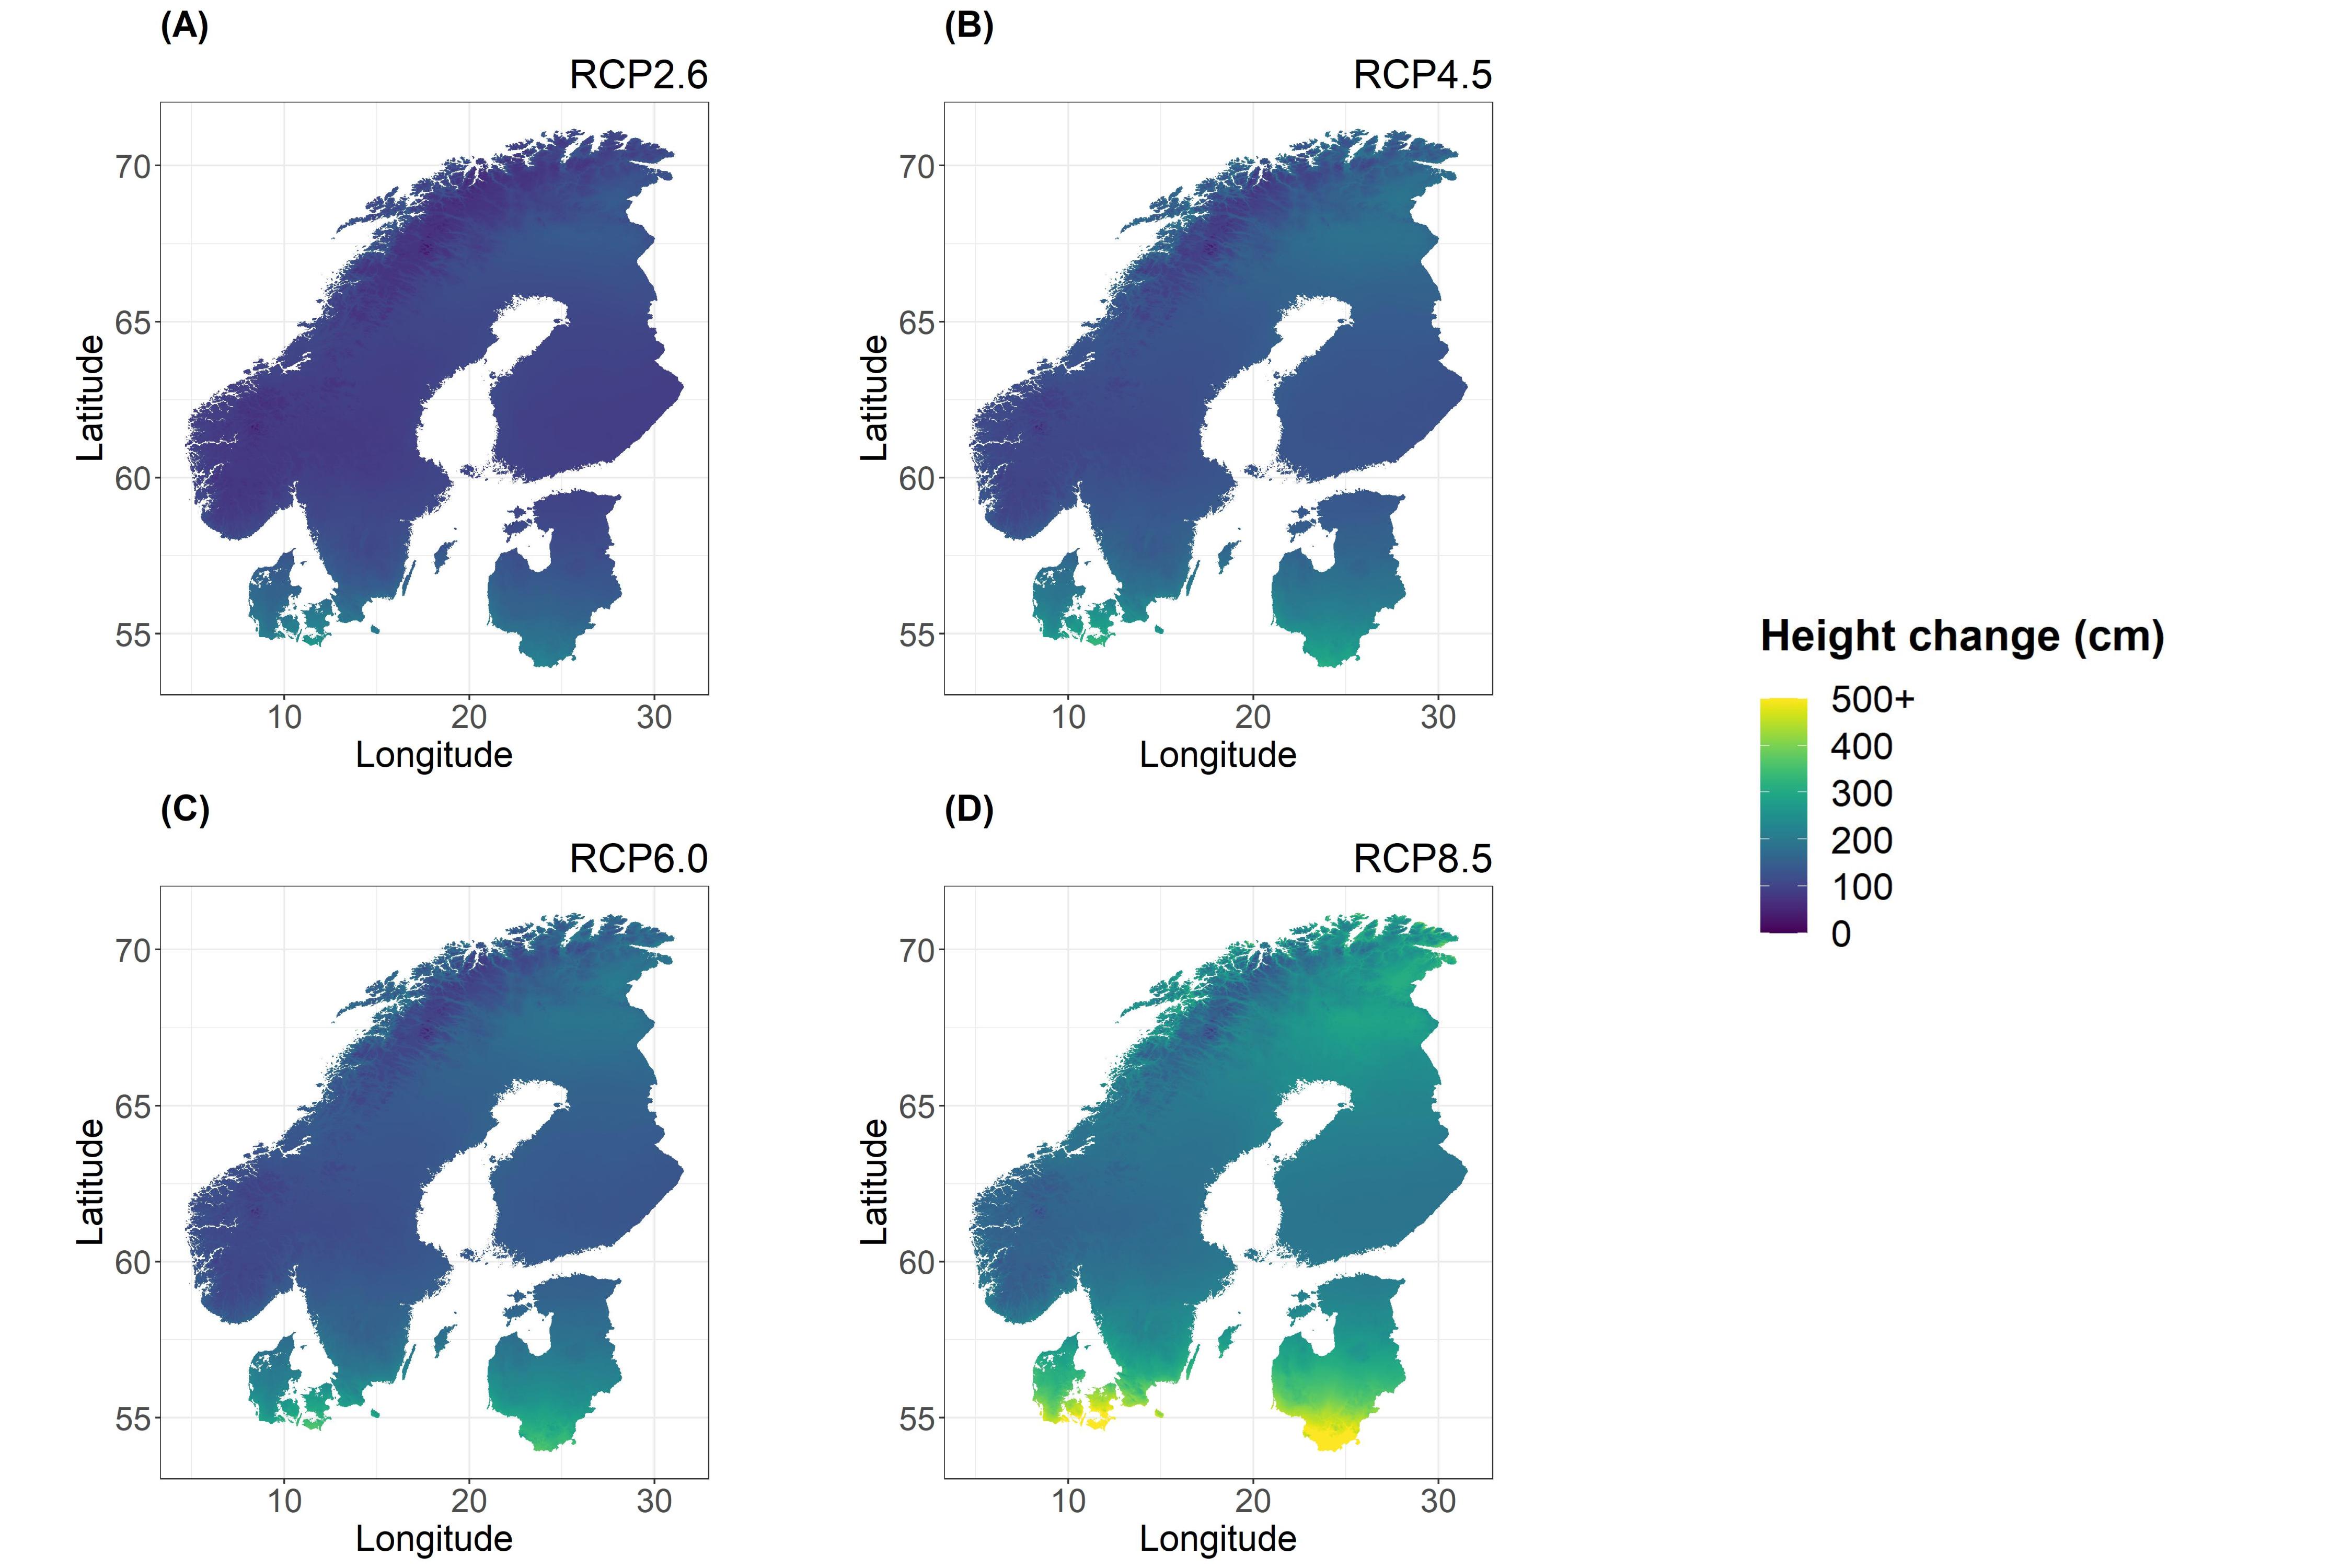

Supplement: Supplementary file 3 [file 31435801 › Data Sheet 1/Supplementary figure 1.JPEG]

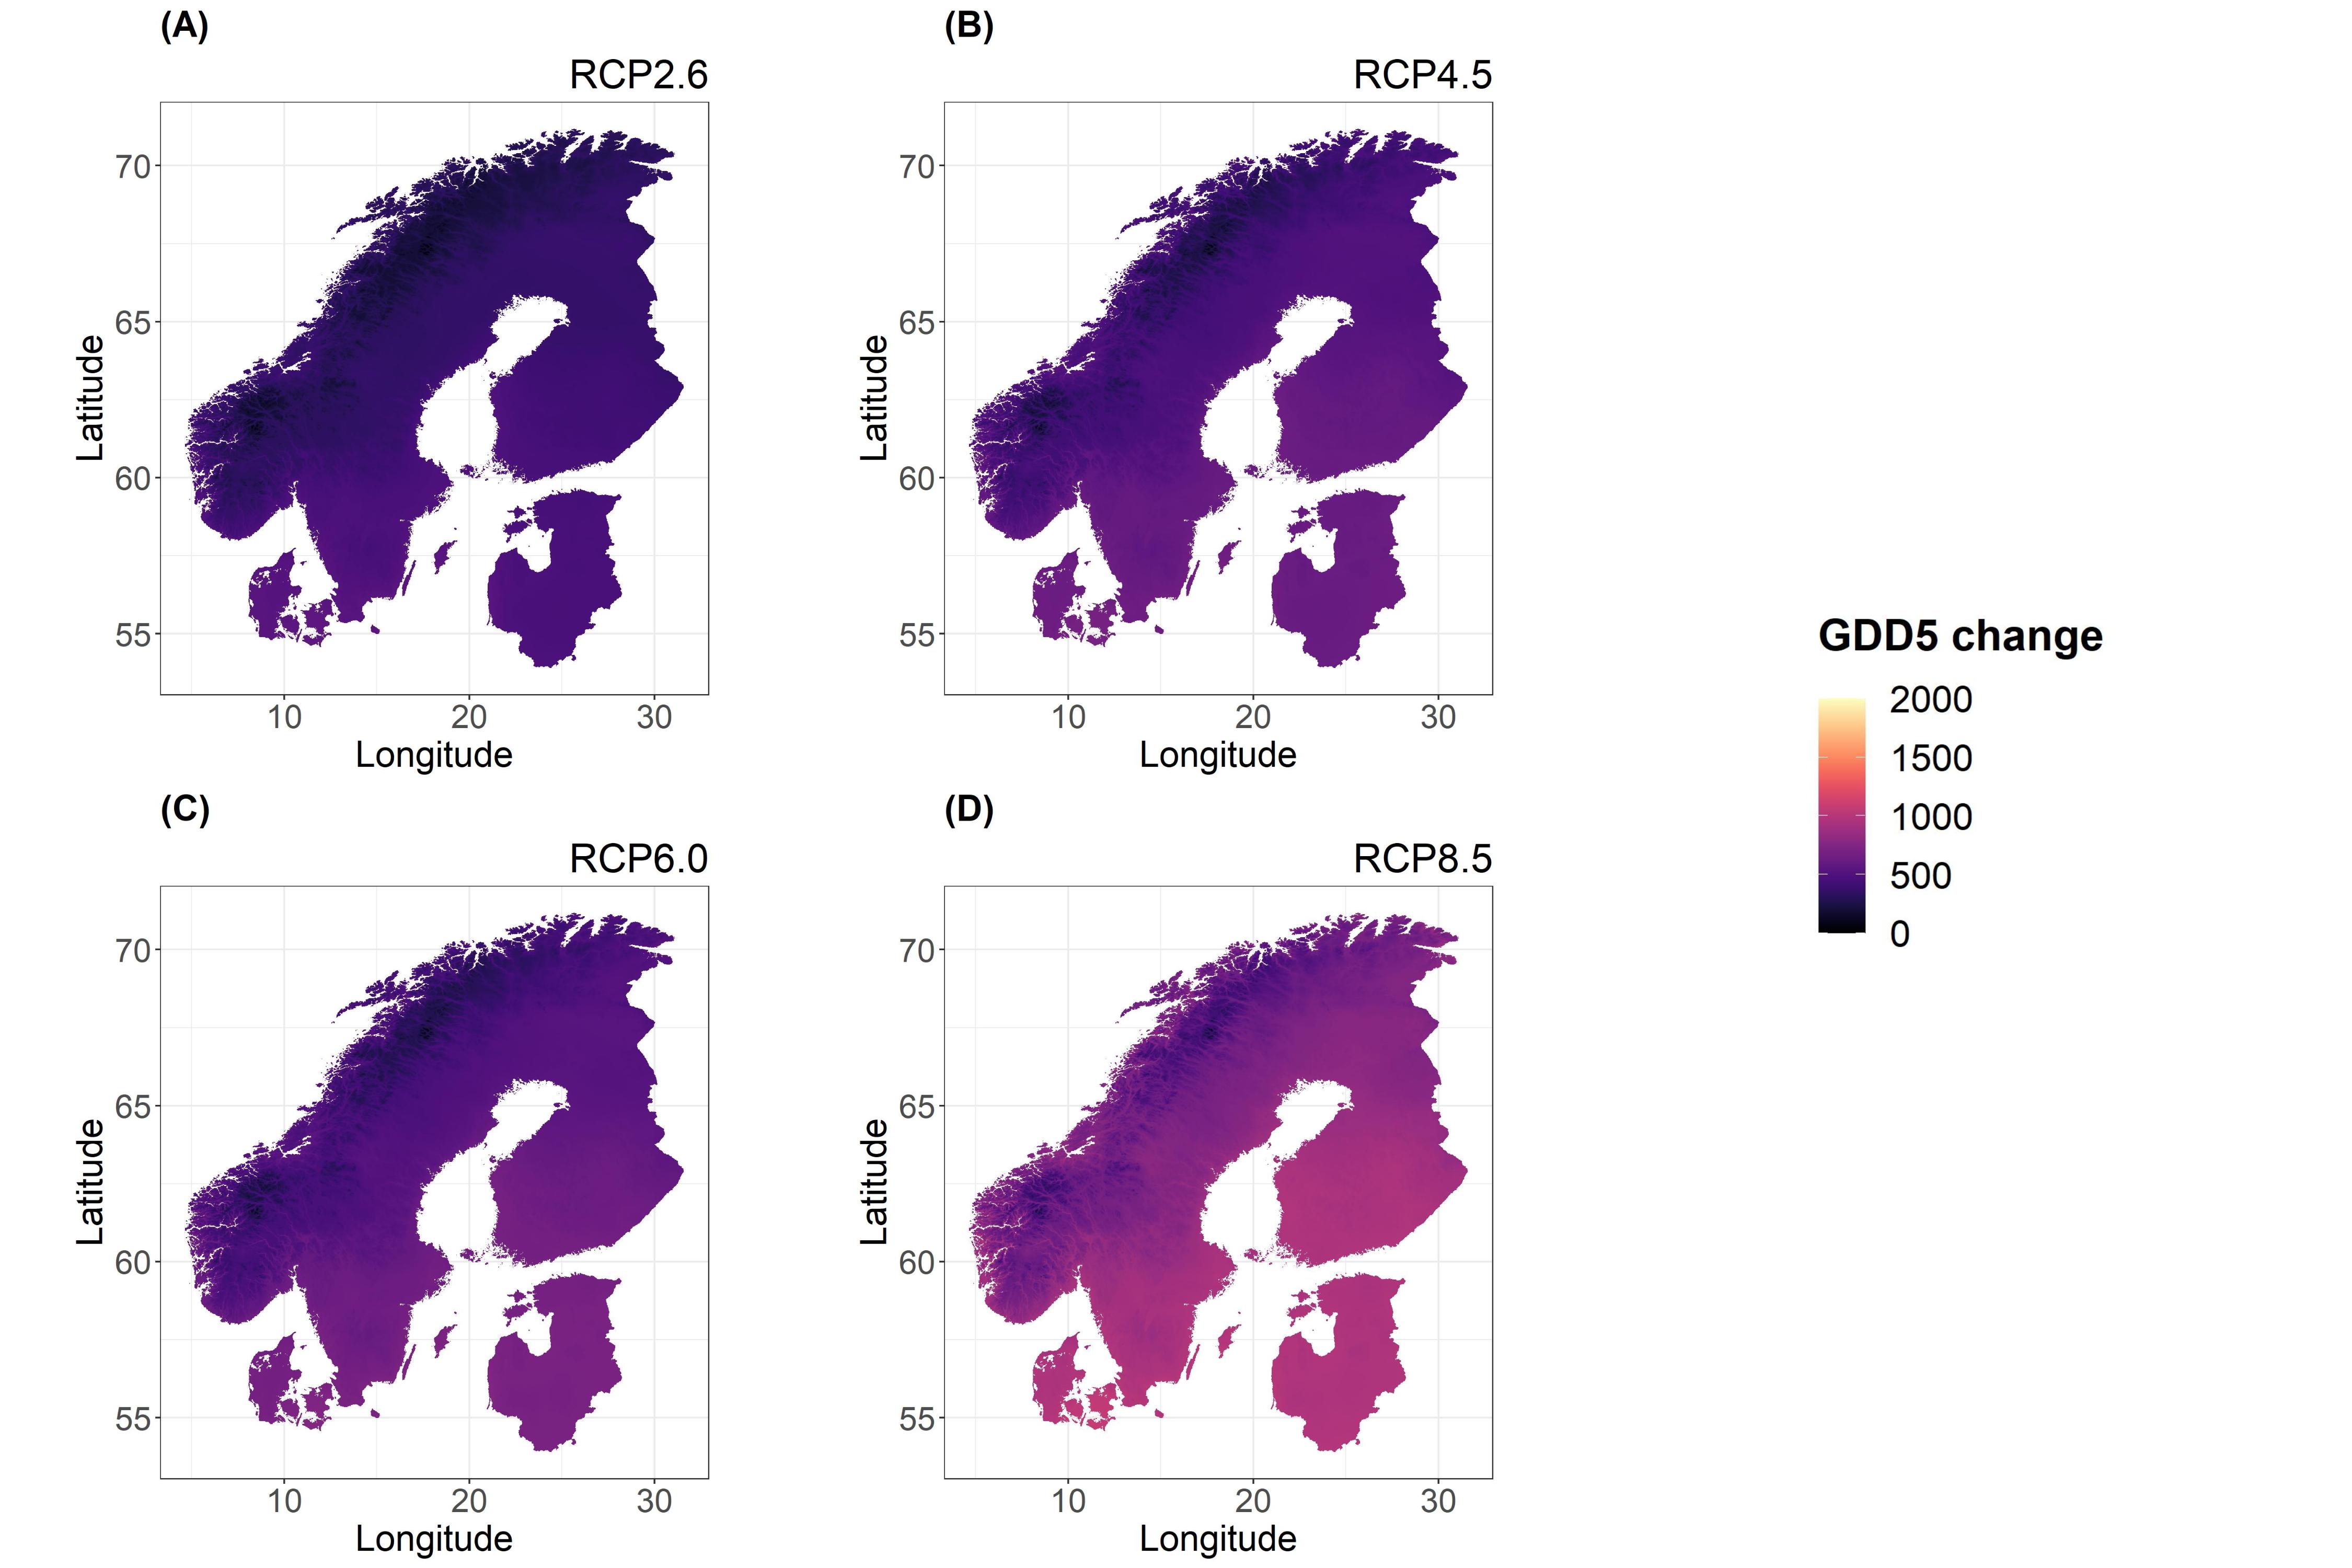

Supplement: Supplementary file 3 [file 31435801 › Data Sheet 1/Supplementary figure 2.JPEG]

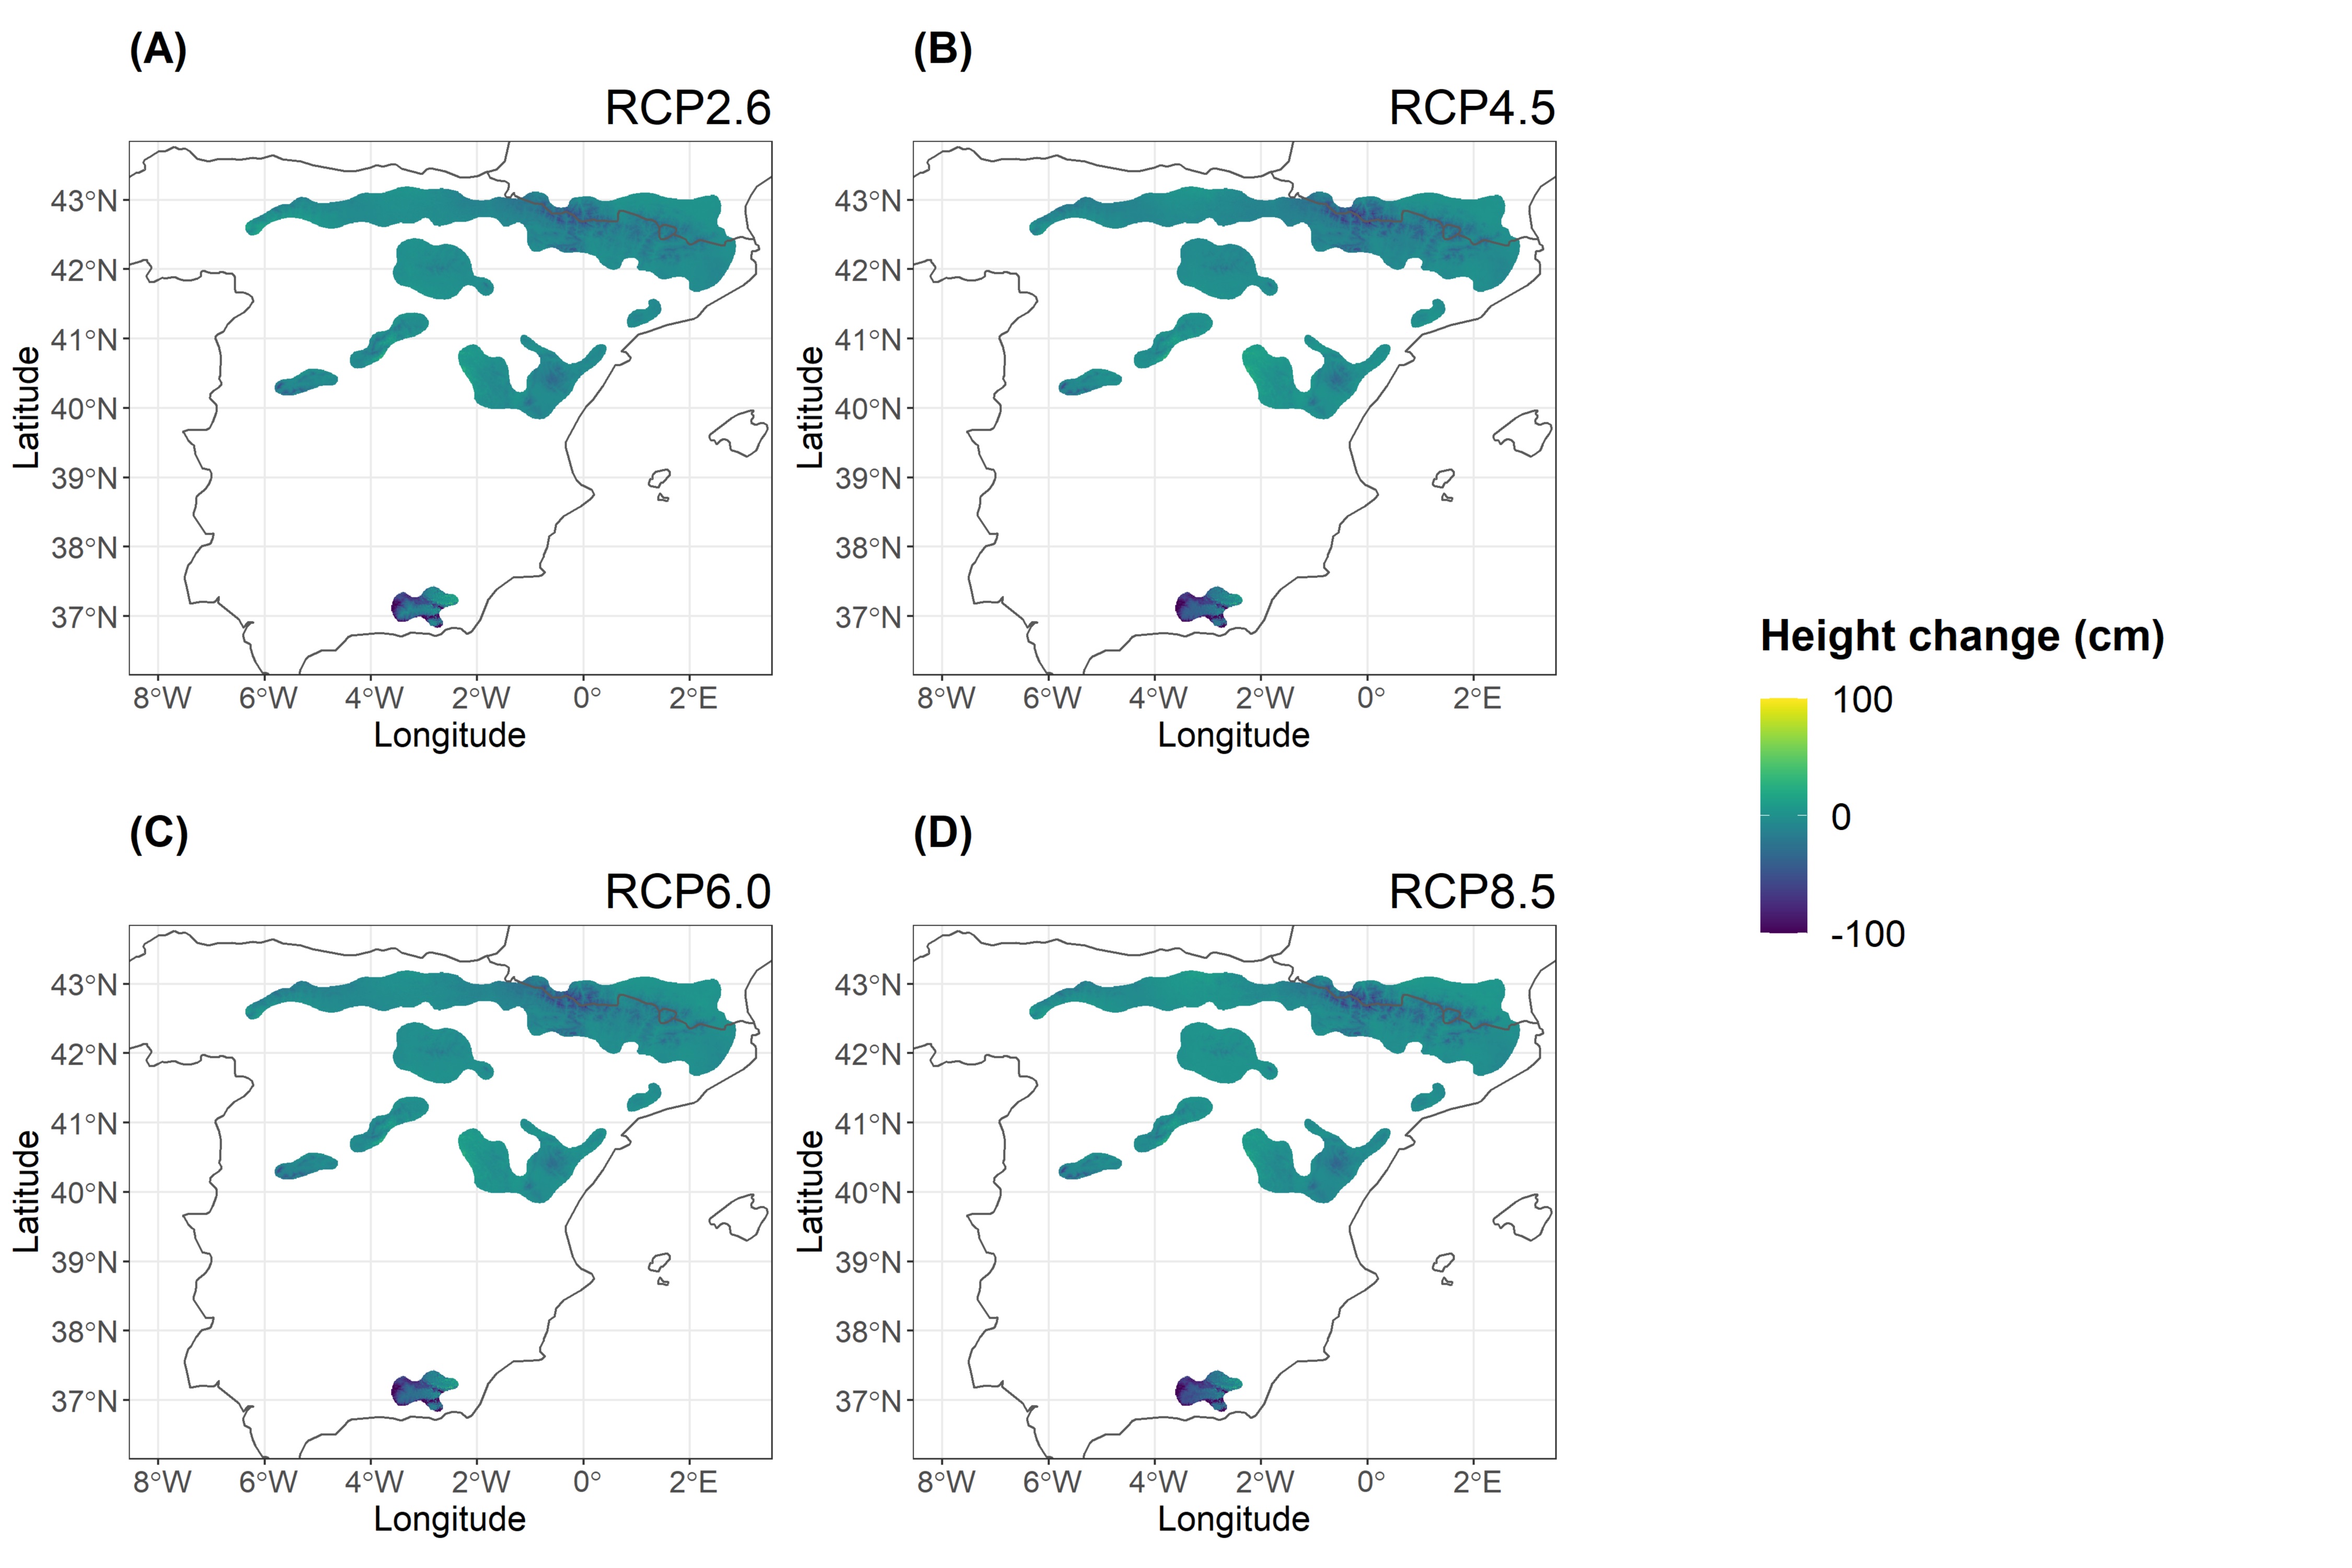

Supplement: Supplementary file 3 [file 31435801 › Data Sheet 1/Supplementary figure 3.JPEG]

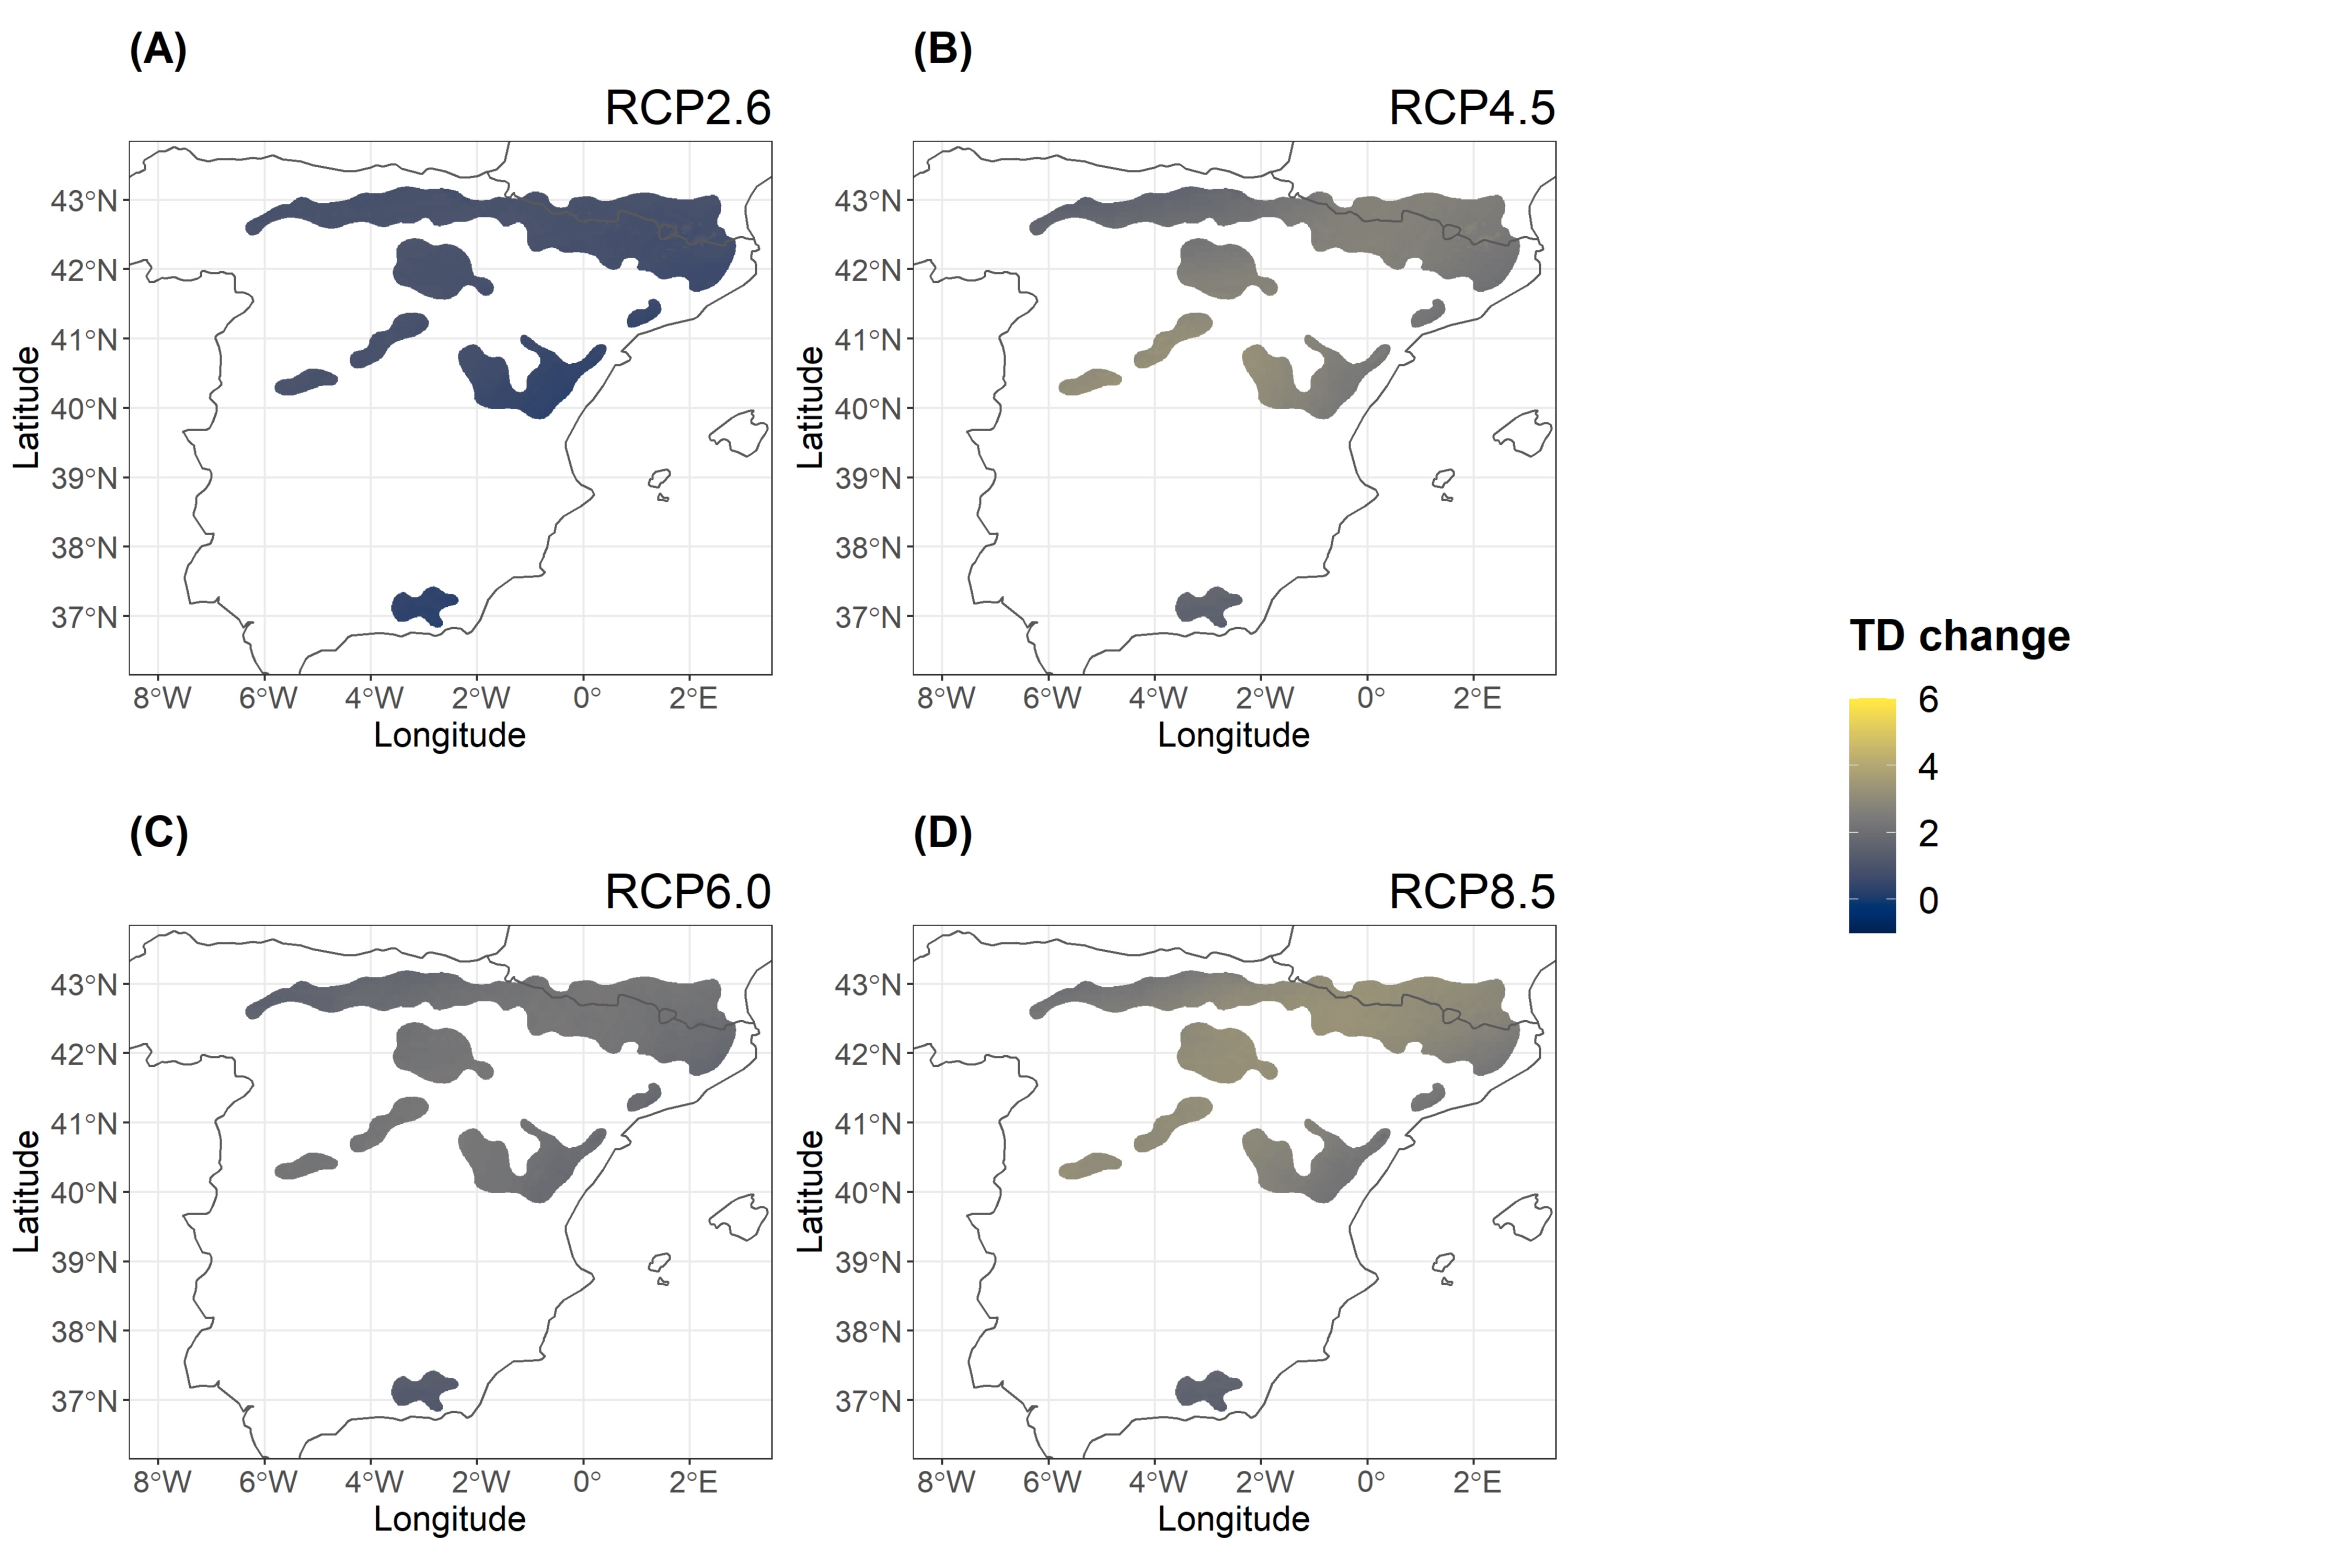

Supplement: Supplementary file 3 [file 31435801 › Data Sheet 1/Supplementary figure 4.JPEG]

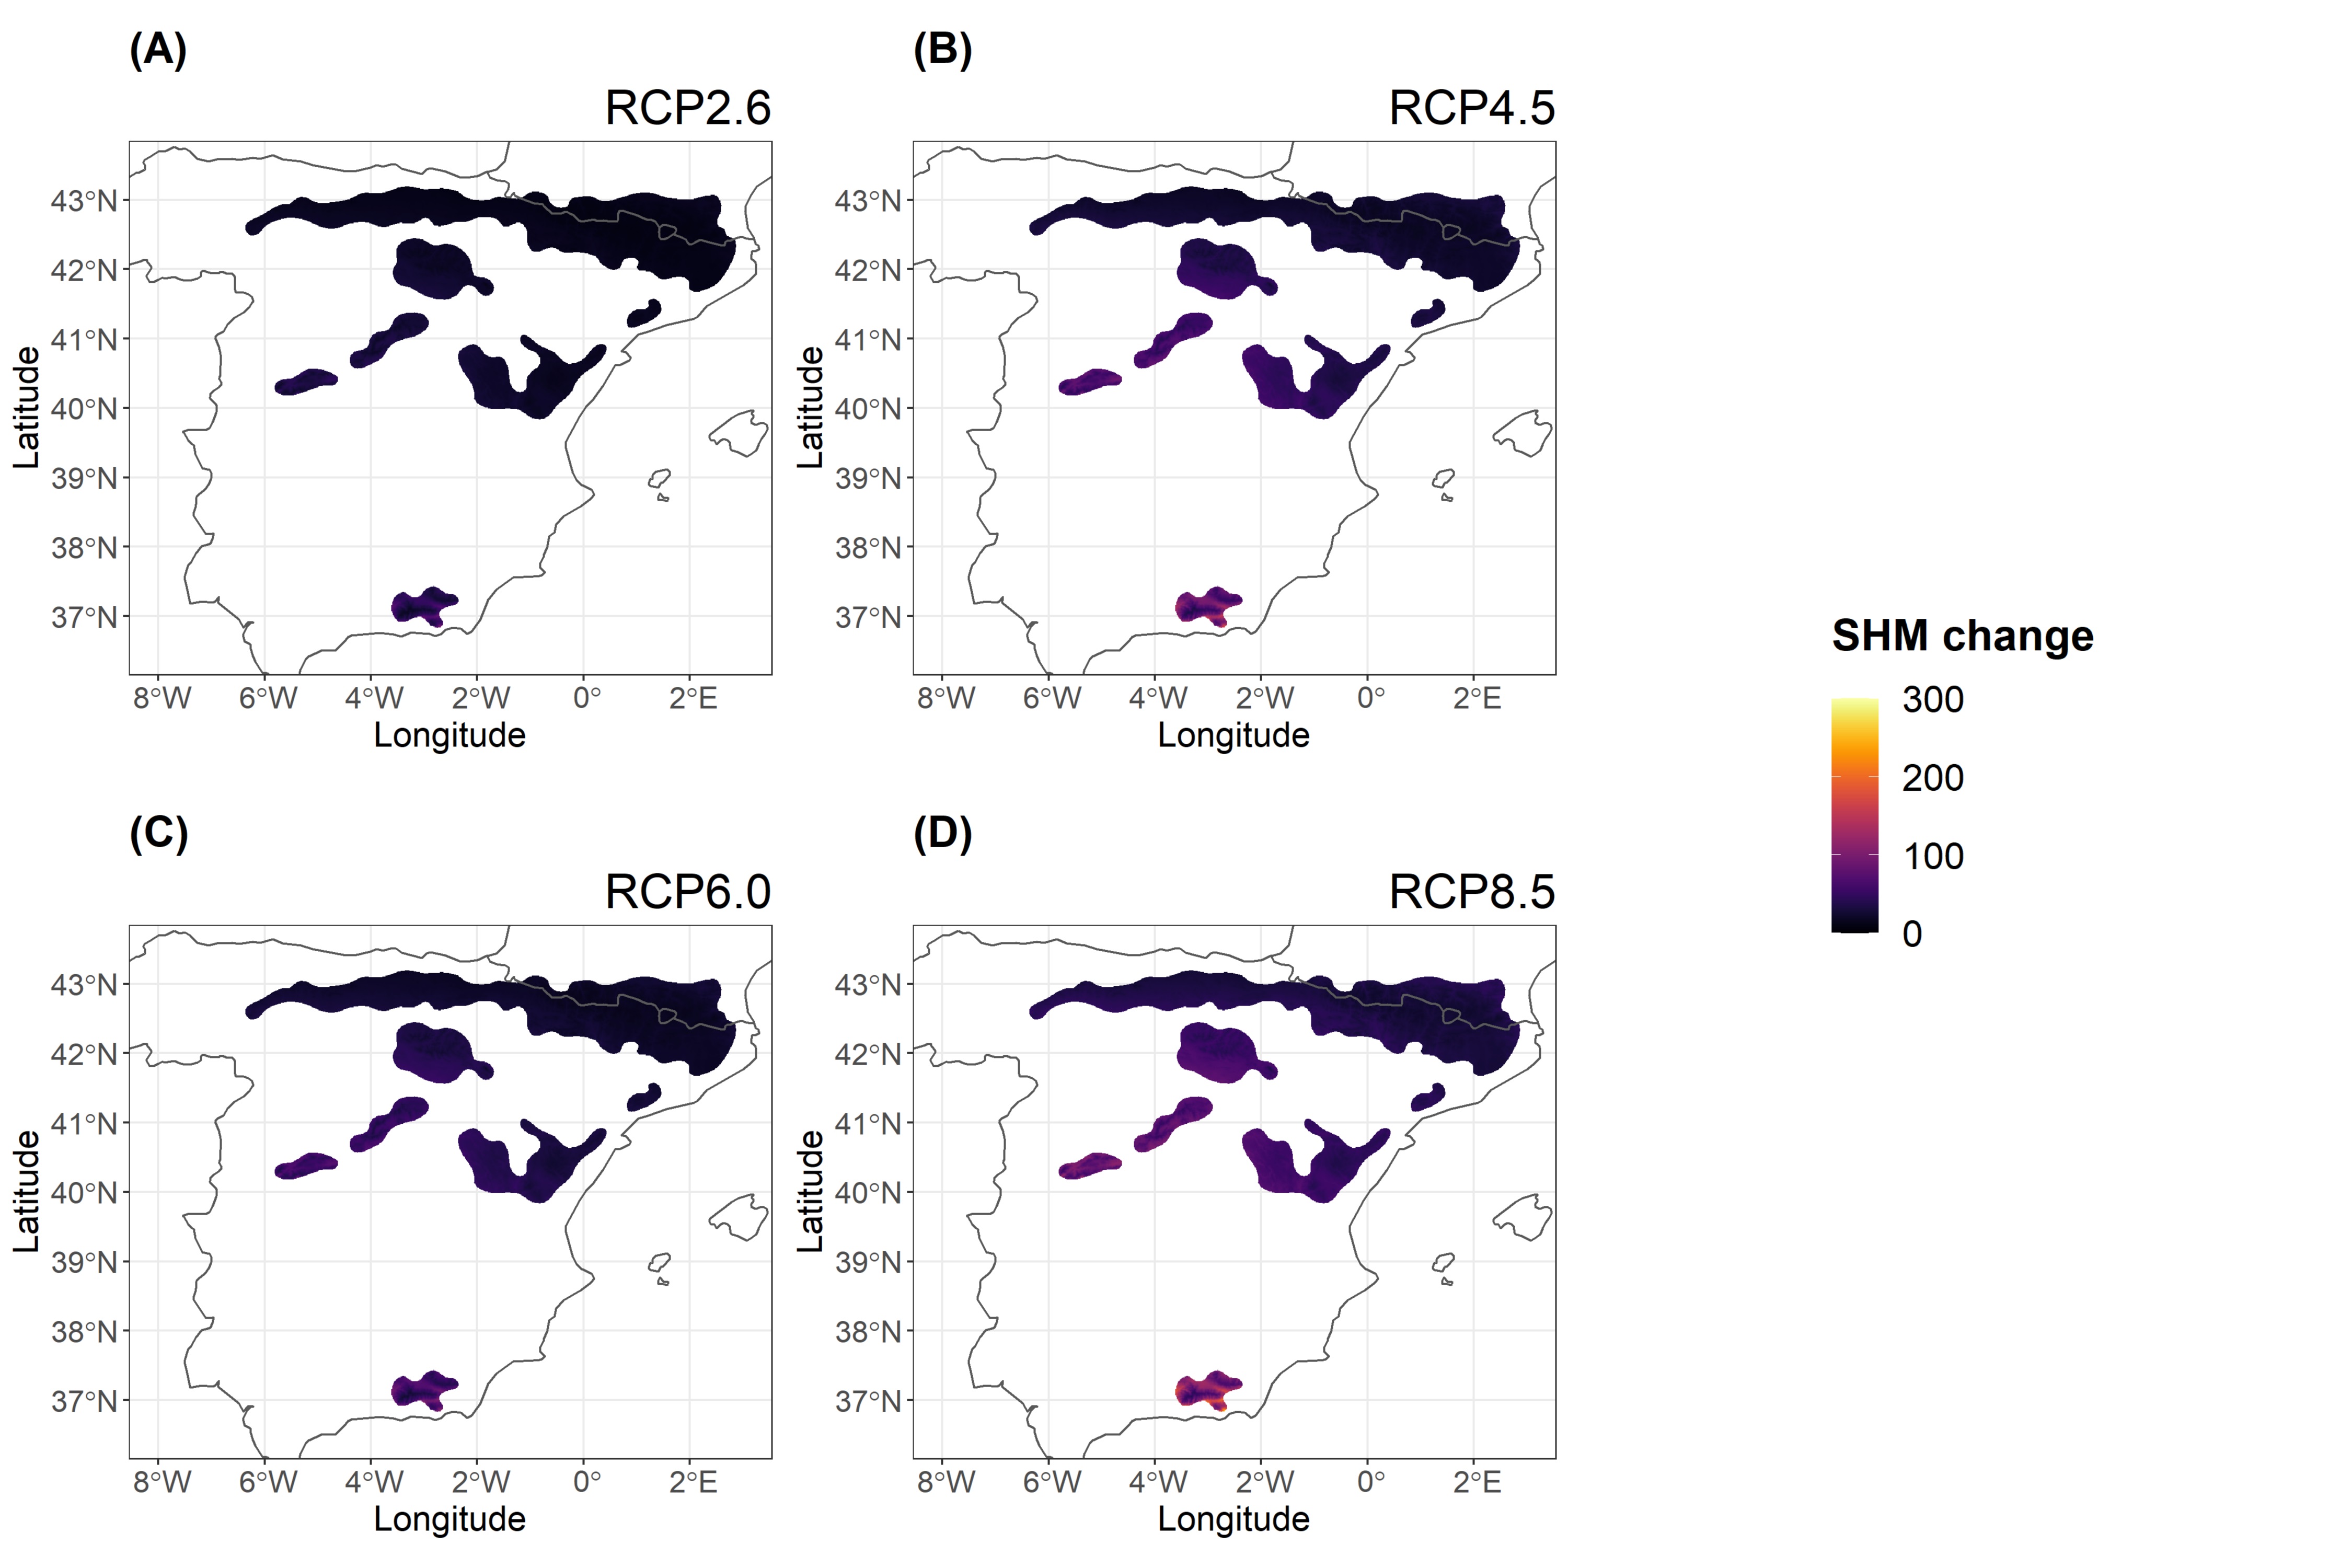

Supplement: Supplementary file 3 [file 31435801 › Data Sheet 1/Supplementary figure 5.JPEG]
